# Supplementary material for: Fully bio-based water-resistant wood coatings derived from tree bark
Source: Royal Society of Chemistry journal article supplement (doi:10.1039/d4mh01010h), 2024-01-01
Supplement: d4mh01010h1.pdf [file d4mh01010h1.pdf]

## Supplementary Information

# Fully bio-based water-resistant wood coatings derived from tree bark

*Fengyang Wang<sup>1</sup>, Mohammad Morsali<sup>1,2</sup>, Jānis Rīžikovs<sup>3</sup>, Ievgen Pylypchuk<sup>1</sup>, Aji P. Mathew<sup>1</sup>, Mika Sipponen<sup>\*1,2</sup>*

*<sup>1</sup>Department of Materials and Environmental Chemistry, Stockholm University,  
SE-10691, Stockholm, Sweden*

*<sup>2</sup>Department of Materials and Environmental Chemistry, Wallenberg Wood Science Center,  
Stockholm University, SE-10691, Stockholm, Sweden*

*<sup>3</sup>Latvian State Institute of Wood Chemistry, Biorefinery Laboratory, Latvia*

*\*Corresponding to [mika.sipponen@mmk.su.se](mailto:mika.sipponen@mmk.su.se)*

*Keywords: wood coating, bark, suberinic acid, water resistance*

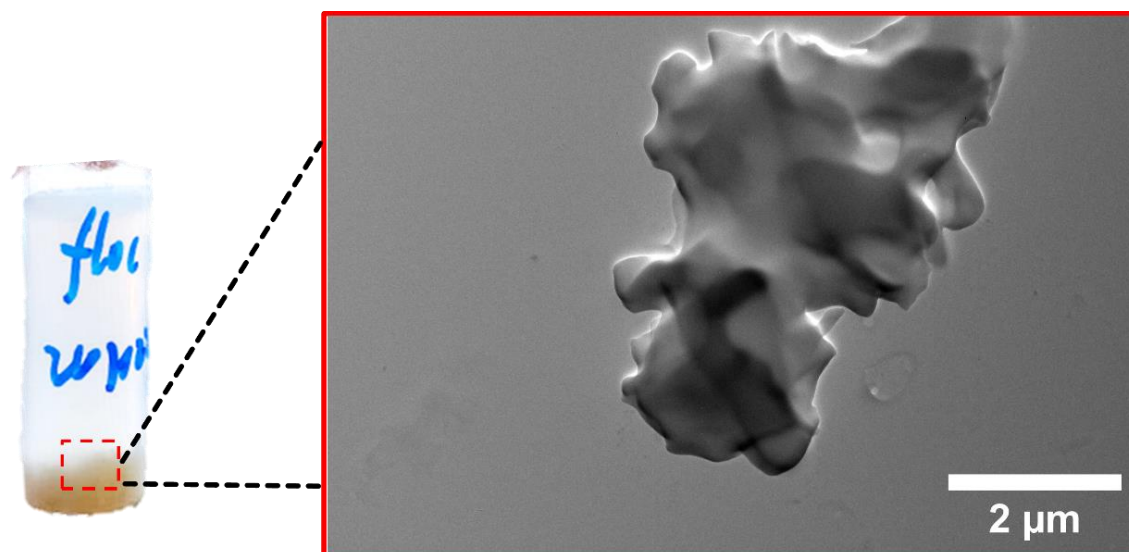

**Fig. S1:** Digital photograph of pure suberin fatty acids particles water dispersion(left) and the corresponding TEM images of the particles(right), which are aggregating and phase separating from water dispersion.

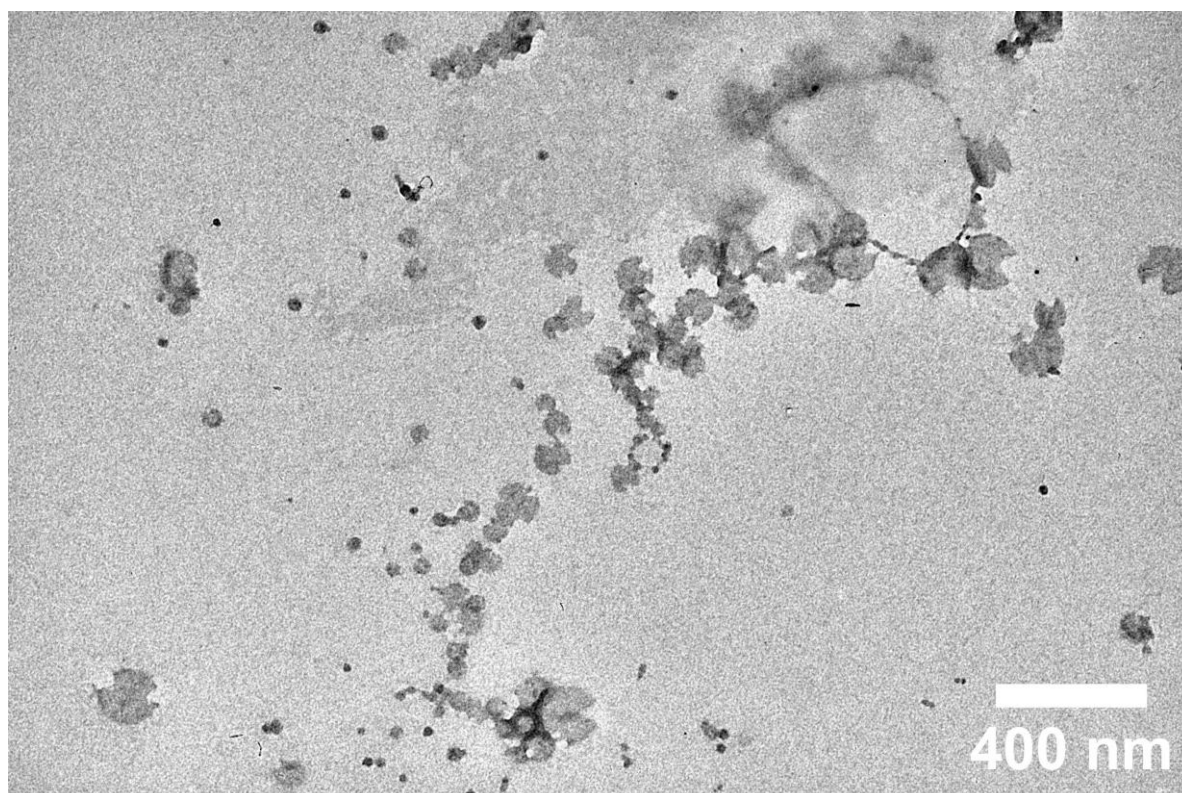

**Fig. S2:** TEM image of hybrid NPs with 30% polyphenols.

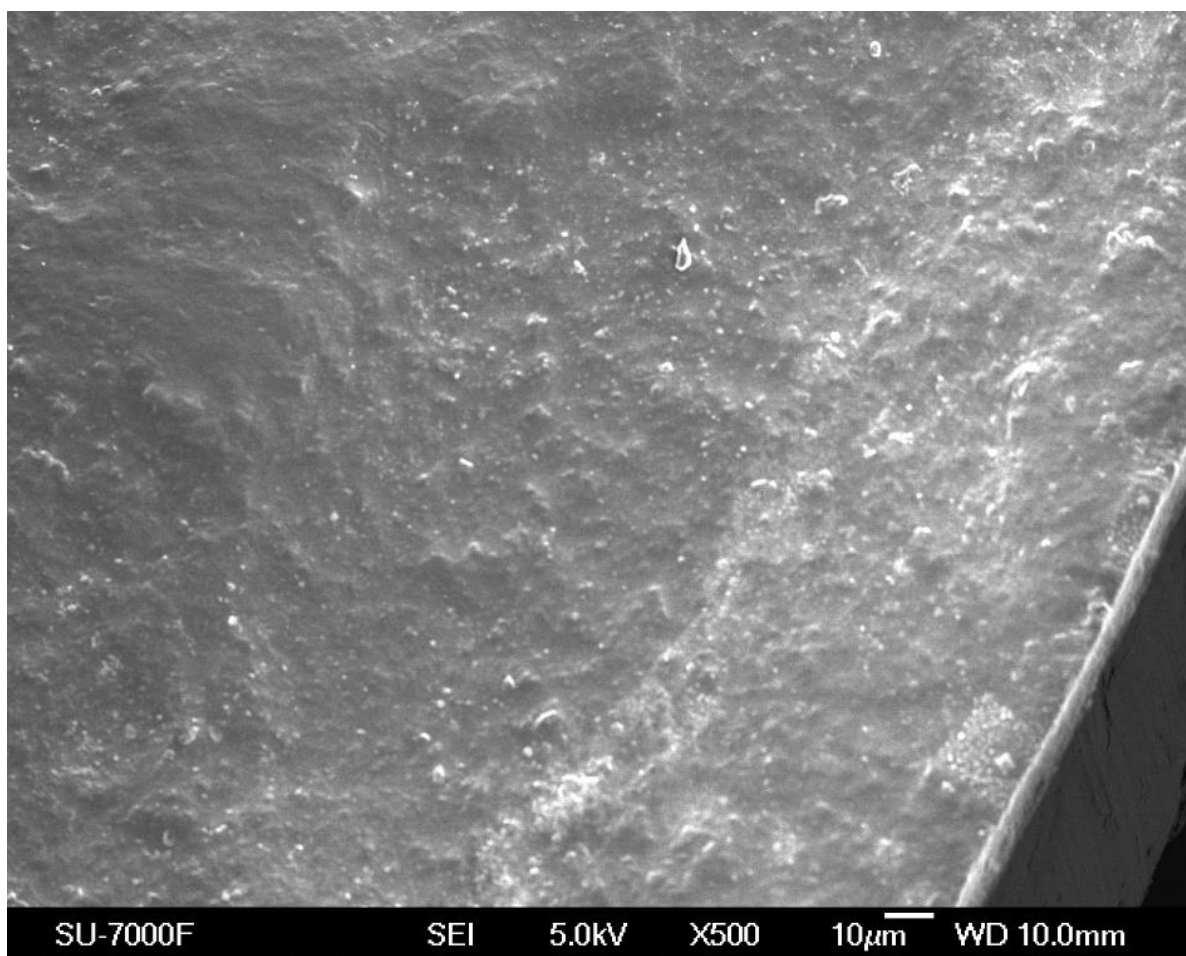

**Fig. S3:** SEM image of the surface of cured hybrid NPs (30% polyphenol) coating

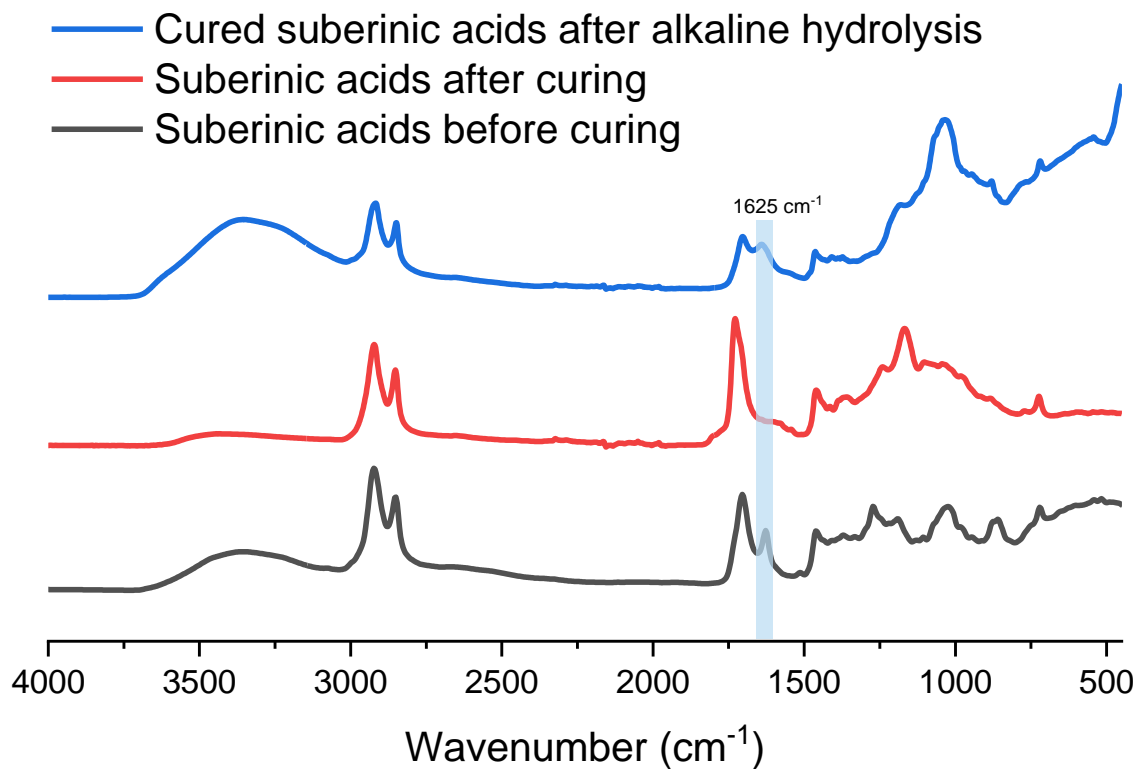

**Fig. S4:** IR spectrum of suberic acids (SAs) before curing, after curing, and after alkaline hydrolysing cured SAs

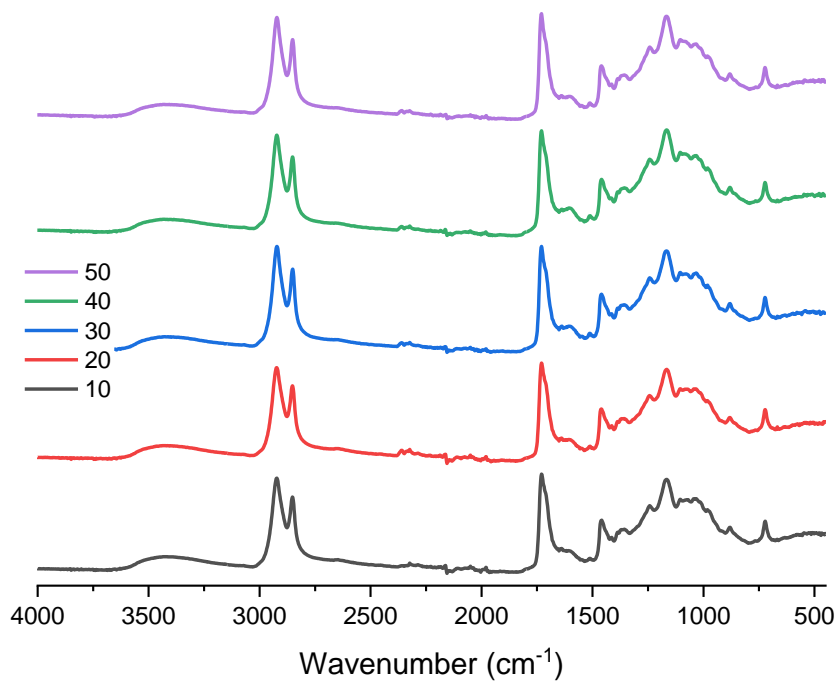

**Fig. S5:** IR spectrum of cured hybrid NPs with different polyphenol content (10-50%)

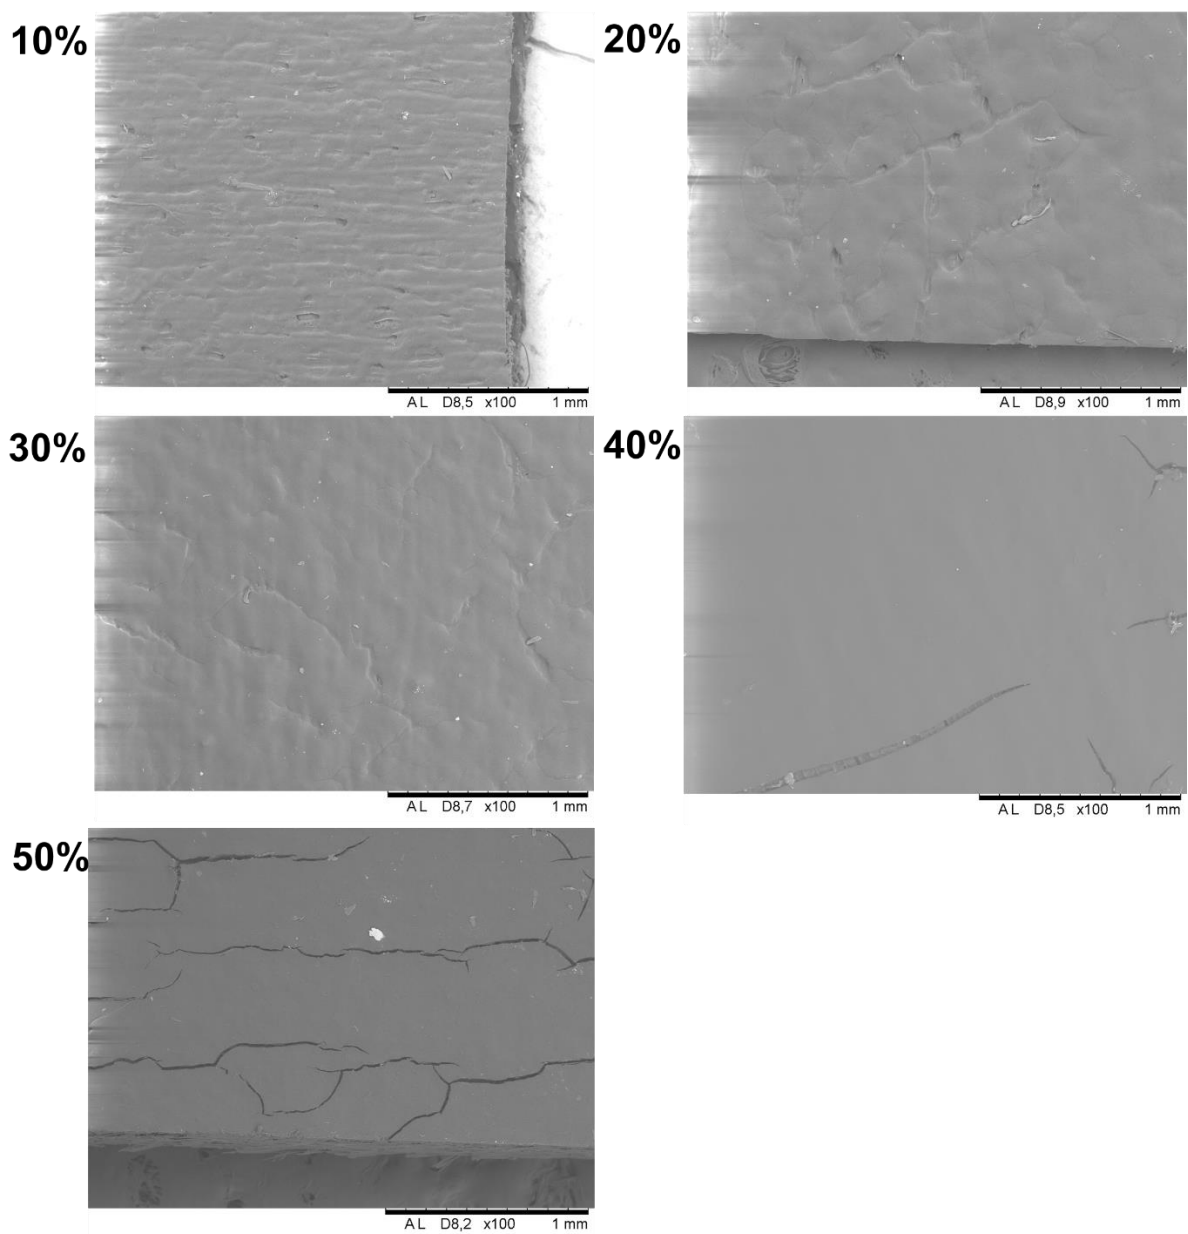

**Figure. S6:** Surface morphology of the hybrid NPs coating with different polyphenol content (10% to 50%).

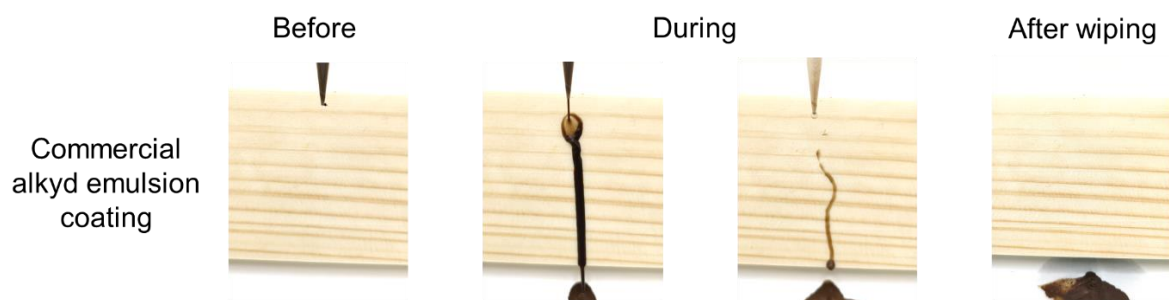

**Fig. S7:** The stain resistance performance of commercial alkyd emulsion coating.

**Table. S1:** Bio-based content and water absorption values used for Fig. 7 of the main text.

| Label in<br>Fig. 7 | Material                   | Bio-based<br>material % (dry) | Water absorption<br>value (g/m <sup>2</sup> ) | Ref. |
|--------------------|----------------------------|-------------------------------|-----------------------------------------------|------|
| 1                  | Linseed oil                | 20-40                         | 110                                           | 1    |
| 2                  | Alkyd emulsion             | 0                             | 240                                           | 1    |
| 3                  | Waterborne<br>polyurethane | 0                             | 640                                           | 2    |
| 4                  | Swedish red paint          | 44                            | 1034                                          | 1    |
| 5                  | Acrylic                    | 40                            | 1100                                          | 3    |
| 6                  | Bio-based<br>polyurethane  | 45                            | 825                                           | 4    |
| 7                  | Bio-based acrylic          | 39                            | 720                                           | 5    |
| 8                  | Tung oil                   | 100                           | 700                                           | 6    |
| 9                  | Linseed oil                | 100                           | 1250                                          | 6    |

## Supplementary References

- (1) Ekstedt, J.; Östberg, G. Liquid Water Permeability of Exterior Wood Coatings-Testing According to a Proposed European Standard Method. *Journal of Coatings Technology* **2001**, *73* (914), 53–59. <https://doi.org/10.1007/BF02698438/METRICS>.
- (2) Calovi, M.; Coroneo, V.; Rossi, S. Antibacterial Efficiency over Time and Barrier Properties of Wood Coatings with Colloidal Silver. *Appl Microbiol Biotechnol* **2023**, *107* (19), 5975–5986. <https://doi.org/10.1007/S00253-023-12710-1/FIGURES/7>.
- (3) Calovi, M.; Rossi, S. The Impact of Stainless Steel Flakes as a Novel Multifunctional Pigment for Wood Coatings. *J Coat Technol Res* **2024**, *21* (3), 1031–1047. <https://doi.org/10.1007/S11998-023-00870-8/FIGURES/15>.
- (4) Calovi, M.; Rossi, S. From Wood Waste to Wood Protection: New Application of Black Bio Renewable Water-Based Dispersions as Pigment for Bio-Based Wood Paint. *Prog Org Coat* **2023**, *180*, 107577. <https://doi.org/10.1016/J.PORGCOAT.2023.107577>.
- (5) Angelski, D.; Atanasova, K. Water Permeability and Adhesion Strength of Bio-Based Coating Applied on Wood. *Drvna industrija* **2024**, *75* (1), 43–48. <https://doi.org/10.5552/DRVIND.2024.0118>.
- (6) Humar, M.; Lesar, B. Efficacy of Linseed- and Tung-Oil-Treated Wood against Wood-Decay Fungi and Water Uptake. *Int Biodeterior Biodegradation* **2013**, *85*, 223–227. <https://doi.org/10.1016/J.IBIOD.2013.07.011>.
